# Supplementary material for: Enhancement of carbamazepine photodegradation using hybrid of phosphorescent carbon dots coupled with highly porous TiO2 photocatalyst
Source: Royal Society of Chemistry journal article supplement (doi:10.1039/d4dt02196g), 2024-11-27
Supplement: d4dt02196g1.pdf [file d4dt02196g1.pdf]

Supplementary information

Enhancement of carbamazepine photodegradation using hybrid of phosphorescent carbon dots coupled with highly porous TiO<sub>2</sub> photocatalyst

Daniela Kujawa <sup>a</sup>, Anna Grzegórska <sup>b</sup>, Anna Zielińska-Jurek <sup>b</sup>, Marzena Fandzloch <sup>a</sup>, Oleksii Bezkrovnyi <sup>a</sup>, Paweł Głuchowski <sup>a</sup>

<sup>a</sup> Institute of Low Temperature and Structural Research, Polish Academy of Sciences, Okólna 2, Wrocław, 50-422, Poland

<sup>b</sup> Department of Process Engineering and Chemical Technology, Faculty of Chemistry, Gdańsk University of Technology, G. Narutowicza 11/12, Gdańsk, 80-233, Poland

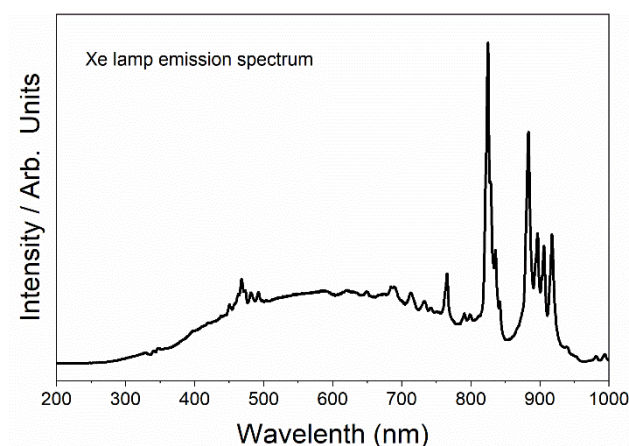

Figure S1. The emission spectrum of the Xe lamp

Table S1. The parameters of the HPLC analysis

| Parameter                | Value                                                        |
|--------------------------|--------------------------------------------------------------|
| Wavelength               | 285 nm                                                       |
| Retention time           | 4.6 min                                                      |
| Temperature              | 45 °C                                                        |
| Flow rate                | 1.5 cm <sup>3</sup> ·min <sup>-1</sup>                       |
| Mobile phase composition | 39.5% acetonitrile, 60% water, and 0.5% orthophosphoric acid |

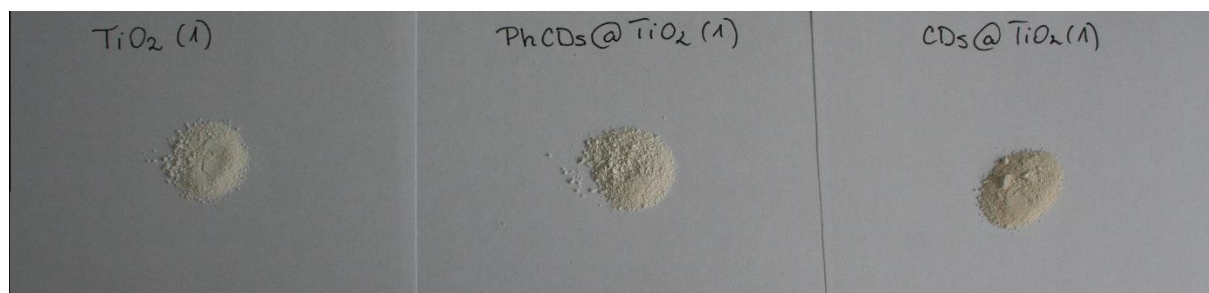

Fig. S2. The image of TiO<sub>2</sub>(1), PhCDs and their hybrid compound.

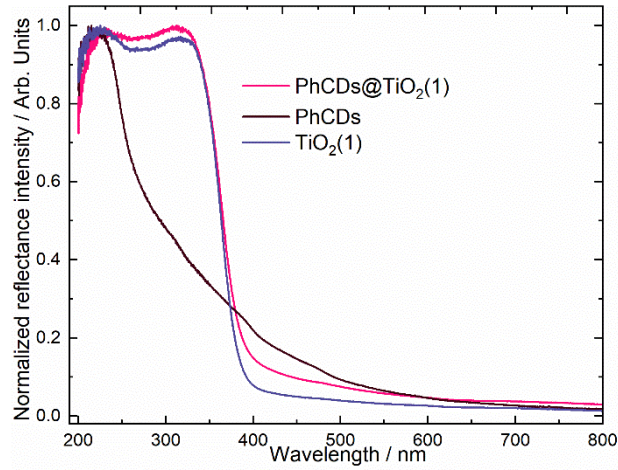

Fig. S3. Normalized absorption spectra of PhCDs@TiO<sub>2</sub>(1), PhCDs and TiO<sub>2</sub>(1) compounds

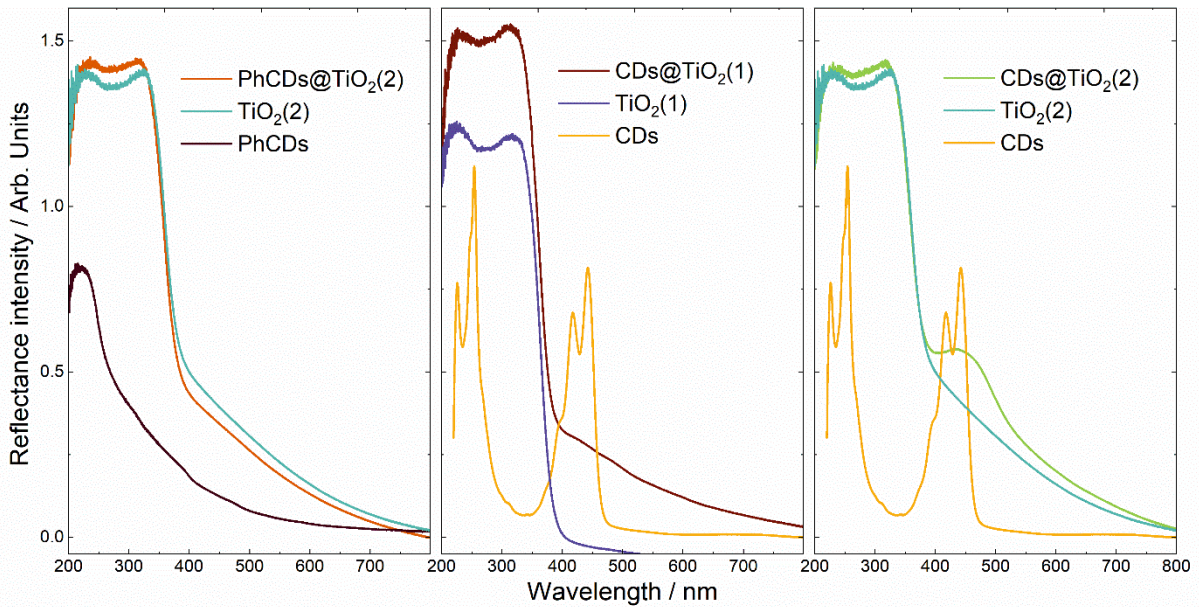

Fig. S4. Absorption spectra of CDs, PhCDs, TiO<sub>2</sub>(1), TiO<sub>2</sub>(2) and their hybrid compounds.

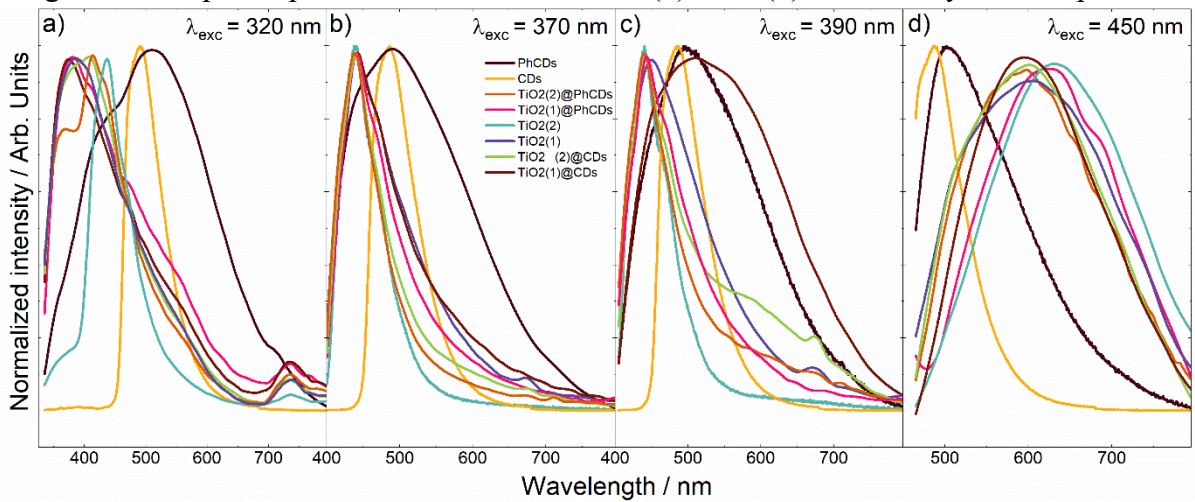

Fig. S5. Normalized emission spectra of CDs, TiO<sub>2</sub> and hybrid materials under excitation wavelength: a) 320 nm, b) 370 nm, c) 390 nm, d) 450 nm

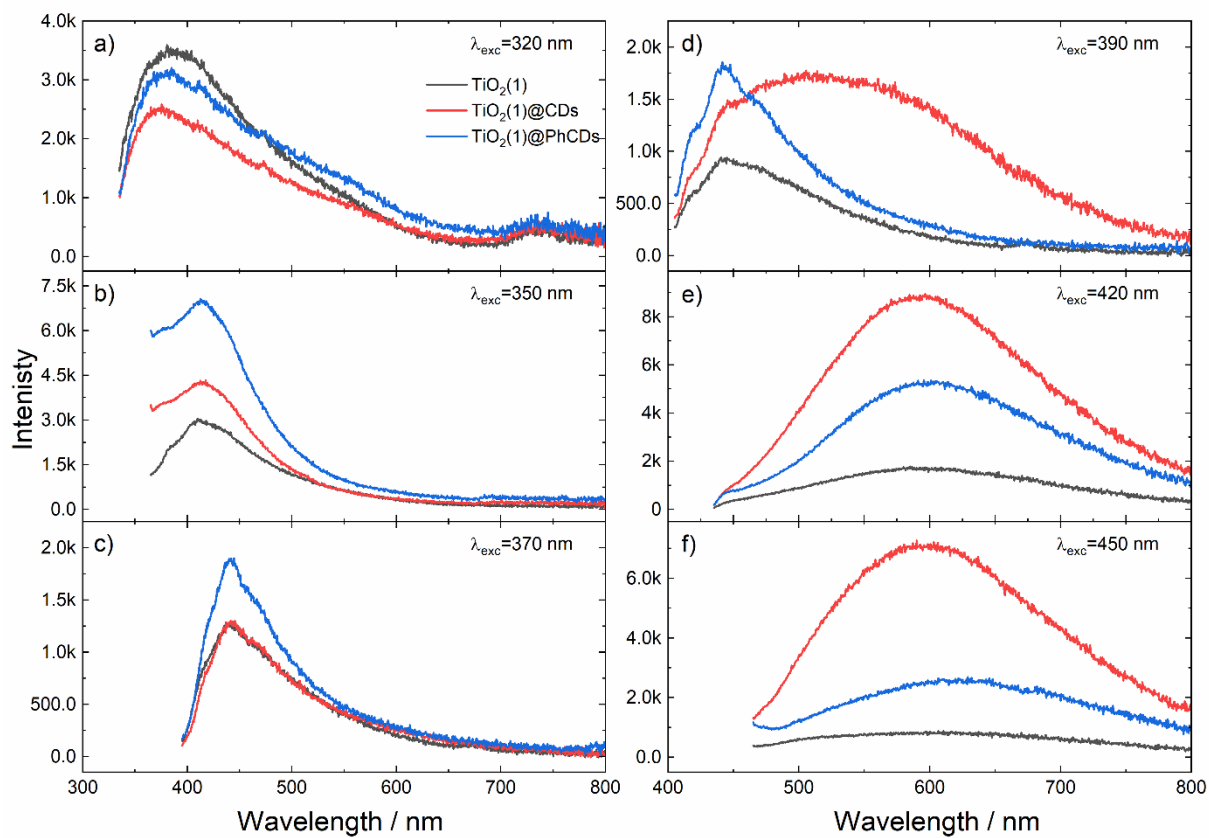

Fig. S6. Emission spectra of  $\text{TiO}_2(1)$  and hybrid materials under excitation wavelength a), 320nm, b) 350 nm, c) 370 nm, d) 390 nm, e) 420 nm, f) 450 nm.

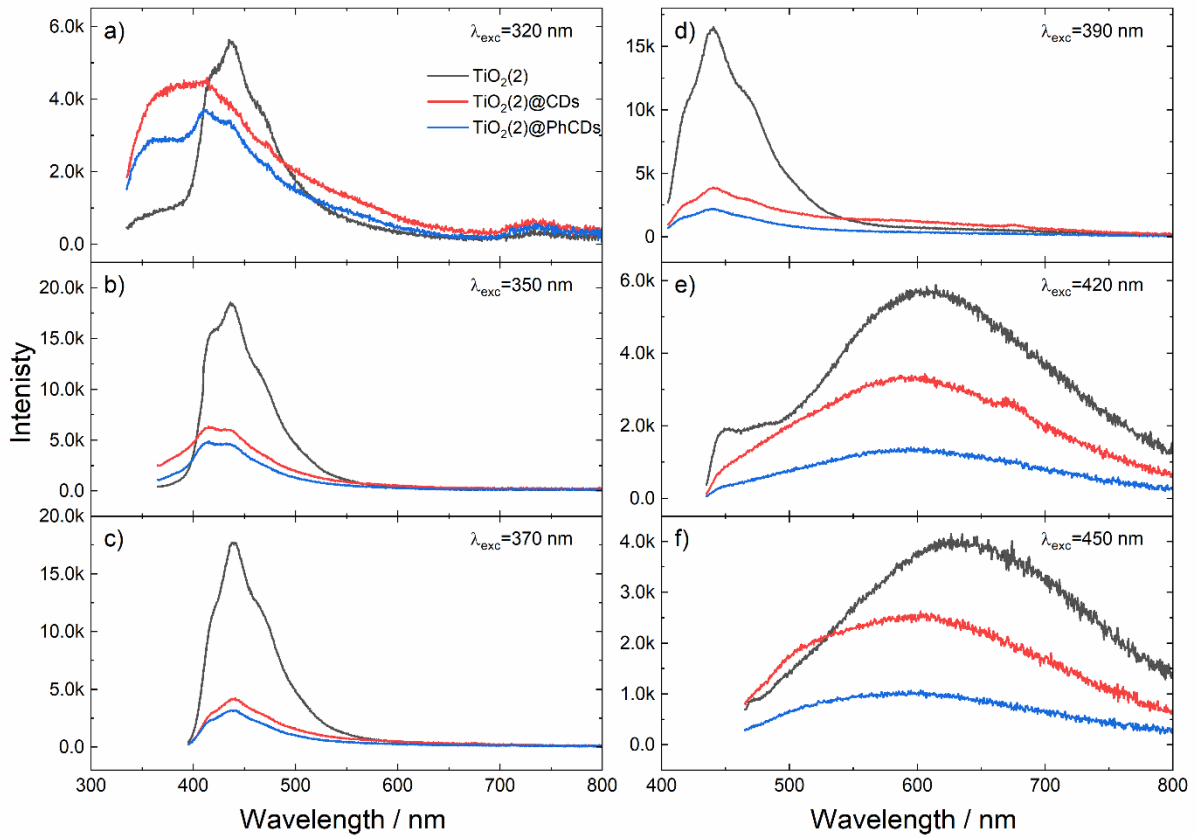

Fig. S7. Emission spectra of  $\text{TiO}_2(2)$  and hybrid materials under excitation wavelength a), 320nm, b) 350 nm, c) 370 nm, d) 390 nm, e) 420 nm, f) 450 nm.

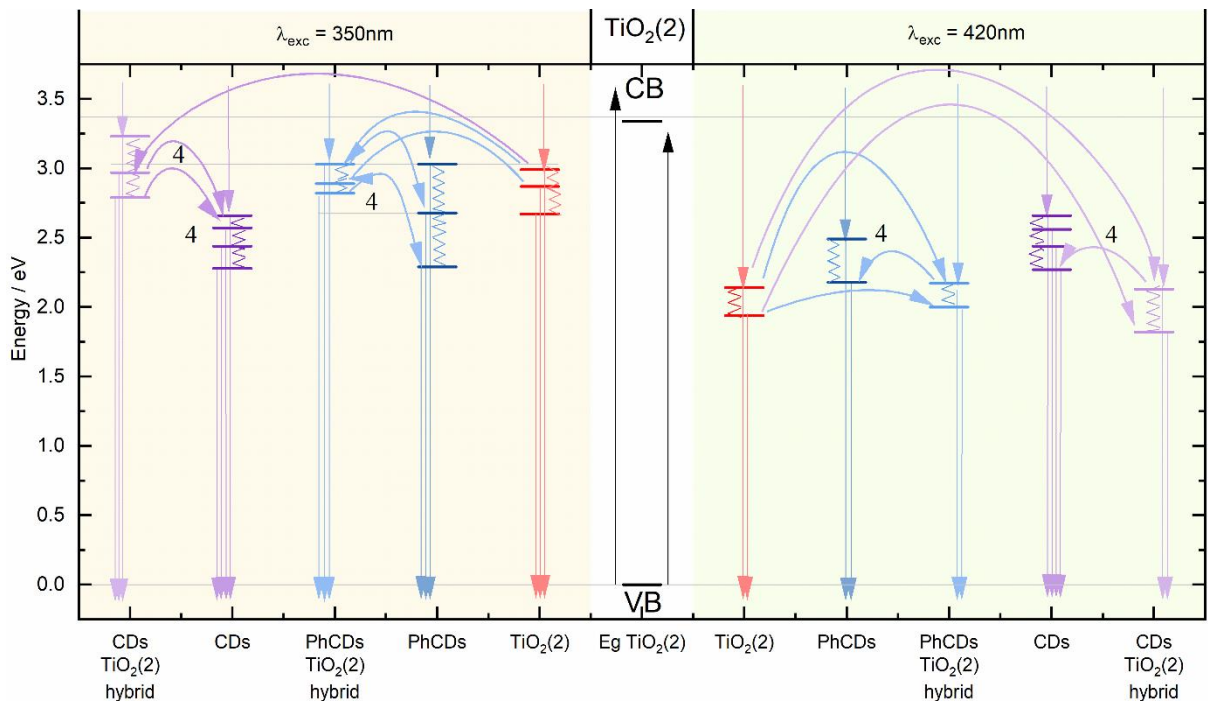

Fig. S8. Scheme of emission mechanism in  $\text{TiO}_2(2)$ , PhCDs, CDs and hybrid materials.
